# Supplementary material for: Recombinase Polymerase Amplification Assay with and without Nuclease-Dependent-Labeled Oligonucleotide Probe
Source: MDPI journal article supplement (doi:10.3390/ijms222111885), 2021-11-02
Supplement: s1 [file s1]

## SUPPLEMENTARY MATERIALS

### Recombinase polymerase amplification assay with and without nuclease-dependent-labeled oligonucleotide probe

Aleksandr V Ivanov, Irina V Safenkova, Anatoly V Zherdev, Boris B Dzantiev\*

A.N. Bach Institute of Biochemistry, Research Centre of Biotechnology of the Russian Academy of Sciences, 119071 Moscow, Russia

\*Corresponding author, e-mail address: dzantiev@inbi.ras.ru

#### CONTENT

|                                                                                                     |   |
|-----------------------------------------------------------------------------------------------------|---|
| <b>Section 1.</b> Primers' sequences for target AMV gene and the amplicons obtained with them ..... | 2 |
| <b>Section 2.</b> In vitro transcription of target AMV RNA3Δ .....                                  | 3 |
| <b>Section 3.</b> Primers' selection by RT-qPCR .....                                               | 4 |
| <b>Section 4.</b> Results of RT-RPA-LFT and their sigmoidal fits .....                              | 6 |
| <b>Section 5.</b> Verification of healthy and infected samples by RT-qPCR .....                     | 7 |
| <b>References</b> .....                                                                             | 8 |

**Section 1.** Primers' sequences for target AMV gene and the amplicons obtained with them

**Table S1.** Primers for AMV detection designed in previous researches.

| Name        | Sequence 5'-3'          | Length, nt | Target RNA of AMV genome | Predicted dimers | Amplicon length, bp | Ref |
|-------------|-------------------------|------------|--------------------------|------------------|---------------------|-----|
| AMV CP1 F   | TCCATCATGAGTTCTTCAC     | 19         | RNA 3                    | No               | 752                 | [1] |
| AMV CP1 R   | AGGACTTCATACCTTGACC     | 19         |                          |                  |                     |     |
| AMV F1      | CCATCATGAGTTCTTCACAAAAG | 23         | RNA 3                    | No               | 351                 | [2] |
| AMV R1      | TCGTCACGTCATCAGTGAGAC   | 21         |                          |                  |                     |     |
| AMV F2      | ATCATGAGTTCTTCACAAAAGAA | 23         | RNA 3                    | No               | 669                 | [2] |
| AMV R2      | TCAATGACGATCAAGATCGTC   | 21         |                          | Yes              |                     |     |
| AMV RNA2 F2 | CGTTCCTACCATAAGGGATGTC  | 22         | RNA 2                    | No               | 795                 | [3] |
| AMV RNA2 R2 | CTTTTGTCAAACTTCGAAAAGTC | 23         |                          | Yes              |                     |     |
| AMV CP 214F | GCGAGATTCTCTACAGTTT     | 20         | RNA 3                    | No               | 363                 | [4] |
| AMV CP 576R | GACCCAACTTCGTTGAATC     | 20         |                          | Yes              |                     |     |

**Sites of designed primers recognition:**

>AMV RNA3 Δ gene

CAATTACTT**CCATCATGAGTTCTTCACAAAAG**AAAGCTGGTGGGAAAGCTGGTAAACCTACTAAACGTT  
 CTCAGAACTATGCTGCC**TTACGCAAAGCTCAACTGCCGAAGCCTCC**GGCGTTGAAAGTCCCGGTTGTAA  
**AACCGACGAATACTATACTGCCACAGACGG**GCTGCGTGTGGCAAAGCCTCGGGACCCCTCTGAGTCTGA  
 G**CTCTTTAATGGGCTCGGCGTGAGATTC**CTCTACAGTTTTCTGAAGGATTCGCGGGACCTCGGATCCT  
 CGAAGAGGATCTGATTACAGGATGGTGTTCATAACACCGTCCTATGCCGGCACCTTTT**GTCTCACT**  
**GATGACGTGACGA**CTGAGGATGGTAGGGCCGTTGCGCATGGTAATCCCATGCAAGAATTCCTCATGGC  
 GCGTTTCACGCTAATGAGAAGTTCGGGTTTGAGTTGGTCTTCACAGCTCCTACCCATGCGGGAATGCAA  
 AACCAAAATTTCAAGCATTCTATGCCGTAGCCCTCTGTCTGGACTTCGACGCGCAGCCTGAGGGATCTA  
 AAAATCCCTCATACCGATTCAACGAAGTTTGGGTCGAGAGAAAGGCGTTCCCGCGAGCAGGGCCCCCTCC  
 GCAGTTTGATTACTGTGGGGCTGCTCGACGAAGCTGACGATCTTGATCGTCATTGATGTACCCATTAAT  
 TTGGGATGCCAAAGTCATTTGATGCTGACCTCCACTGGGTGGATTAAGGTCAAGGTATGAAGTCCTATT  
 CGCTCCTGATAGGATCGACTTCATATTGCTTATATATGTGCTAACGCACATATATAAATGCTCATGCAAAA  
 CTGCATGAATGCCCTAAGGGATGC

Primer annealing legend: **F1** , **F3**, **F4**, **THF FAM**, **THF block**, **R4**, **R1**, **R3**

**Table S2.** Lengths of potential amplicons, bp.

|    | F1  | F3  | F4  | THF FAM |
|----|-----|-----|-----|---------|
| R1 | 351 | 358 | 274 | 223     |
| R3 | 360 | 367 | 283 | 232     |
| R4 | 227 | 243 | 150 | 99      |

## Section 2. In vitro transcription of target AMV RNA3Δ

In-vitro transcription of AMV RNA3Δ was performed as described in the Material and Methods Section. A DNA template with a length of 900 bp was synthesized by PCR. 2.5 μL (1/20 volume) of transcription mix taken after 3h of the reaction was analyzed by electrophoresis in 2% agarose-TBE gel (**Figure S1A**). Target RNA (859 nt) was detected as band and corresponded 400-500 bp of DNA ladder. The mix was treated by DNaseI and then purified through the RNA cleanup kit. 50 ng RNA was analyzed by electrophoresis in 2% agarose-TBE gel (**Figure S1B**).

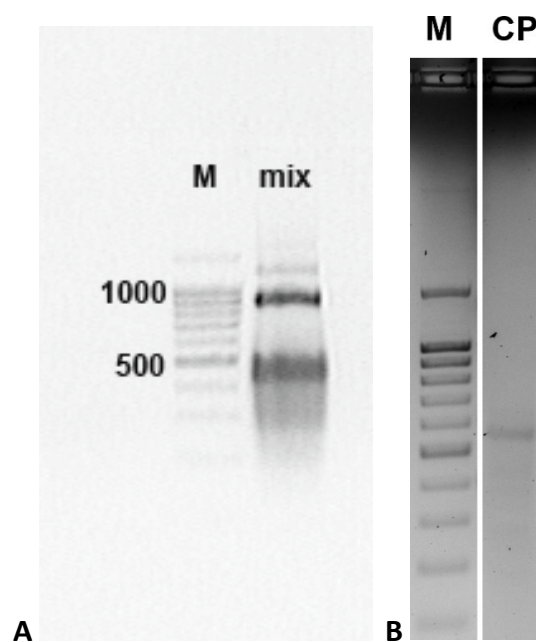

**Figure S1.** Electrophoresis of RNA corresponding CP gene of AMV (AMV RNA3Δ) in 2% agarose gel in TBE. A. Transcription mix after 3h of the reaction: M – DNA ladder marker (Evrogen), mix – transcription mix. B. Purified AMV RNA3Δ after DNaseI treatment and cleaning by RNA kit (NEB). M - DNA ladder marker (Evrogen), CP – RNA of coat protein or AMV RNA3Δ.

### Section 3. Primers' selection by RT-qPCR

The transcribed AMV RNA3 was sequentially diluted from  $10^7$  to 10 copies and used as a template for sensitivity assessment. All the tested pairs demonstrate a saturation signal at a low concentration of AMV RNA3 or mQ background in RT-qPCR. It should cause the formation of by-products or cross-reaction between the primers. All tested pairs showed non-pronounced linear concentration dependence (**Figure S2**) that impaired the quantification of the AMV RNA3 target. Feasibly, the low sensitivity of RT-qPCR ( $10^4$ – $10^5$  copies for different pairs) could be caused by the twisting of the RNA.

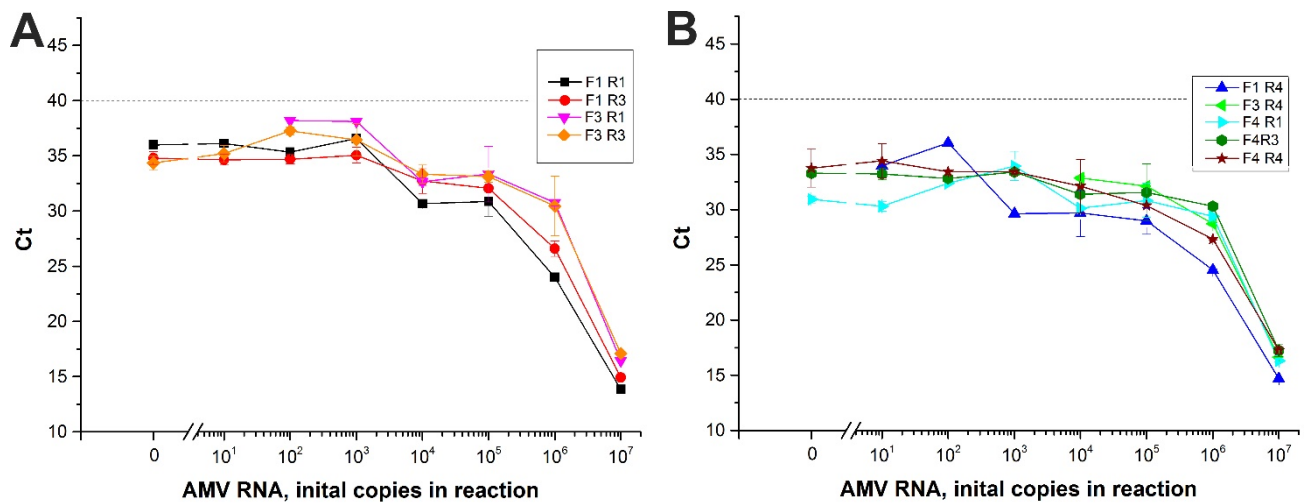

**Figure S2.** Results of RT-qPCR of target AMV RNA3 $\Delta$  obtained with different combinations of primers. A. RT-qPCR curves obtained with F1-R1, F1-R3, F3-R1, and F3-R3 primers' combination. B. RT-qPCR curves obtained with F1-R4, F3-R4, F4-R1, F4-R3, and F4-R4 primers' combination.

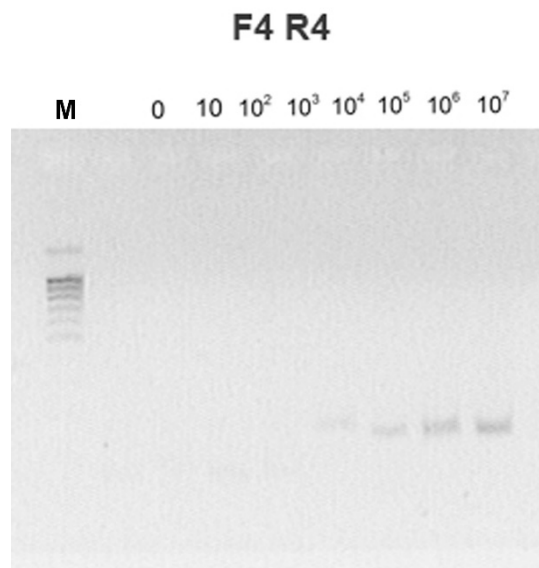

**Figure S3.** Electrophoresis of samples after RT-qPCR with the F4-R4 pair in presence of different amounts of the target AMV RNA. M – DNA ladder marker (Evrogen).

#### Section 4. Results of RT-RPA-LFT and their sigmoidal fits

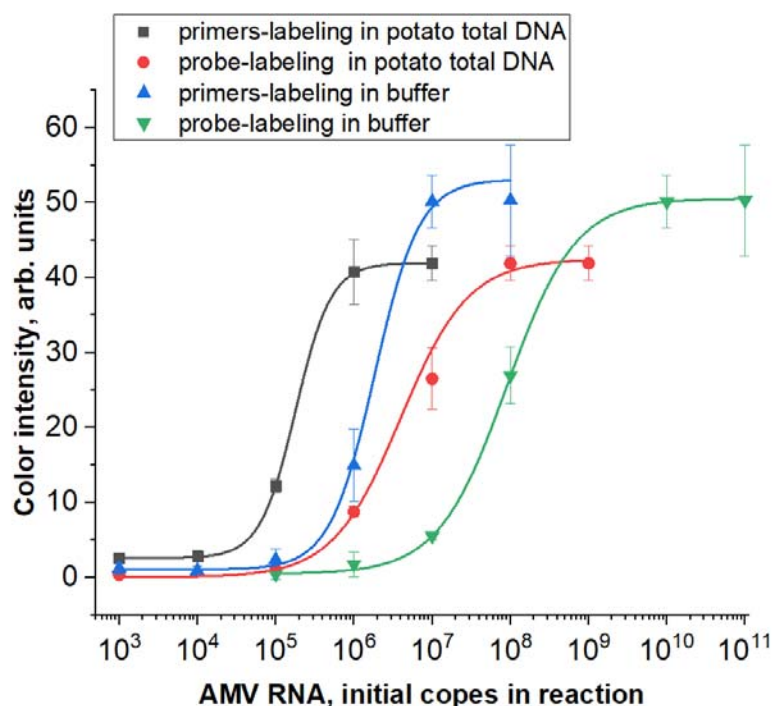

**Figure S4.** Results of RT-RPA-LFT for different amount of synthetic AMV RNA3 performed by primers-labeling and probe-labeling methods. The target RNA diluted in TE buffer or in potato total DNA. Curves were obtained by sigmoidal fitting.

**Table S3.** Parameters of sigmoidal fits for results of RT-RPA-LFT for different amount of synthetic AMV RNA3 performed by primers-labeling and probe-labeling methods.

| Model                        | Logistic                                |                                       |                               |                             |
|------------------------------|-----------------------------------------|---------------------------------------|-------------------------------|-----------------------------|
| Equation                     | $y = A2 + (A1-A2)/(1 + (x/x0)^p)$       |                                       |                               |                             |
| Plot                         | primers-labeling in<br>potato total DNA | probe-labeling in<br>potato total DNA | primers-labeling<br>in buffer | probe-labeling<br>in buffer |
| A1                           | $2.6 \pm 0.03$                          | $0.04 \pm 0.41$                       | $1.06 \pm 0.24$               | $0.47 \pm 0.21$             |
| A2                           | $41.97 \pm 0.23$                        | $42.47 \pm 1.73$                      | $53.1 \pm 3.48$               | $50.57 \pm 1.11$            |
| x0 (half-maximum<br>binding) | $1.8E5 \pm 0.8E5$                       | $4.0E6 \pm 0.9E6$                     | $1.8E6 \pm 0.5E6$             | $9.0E7 \pm 0.9E7$           |
| p                            | $1.92 \pm 0.14$                         | $1.0 \pm 0.15$                        | $1.52 \pm 0.38$               | $0.99 \pm 0.05$             |
| R-Square                     | 0.99998                                 | 0.99785                               | 0.99769                       | 0.99923                     |

Section 5. Verification of healthy and infected samples by RT-qPCR

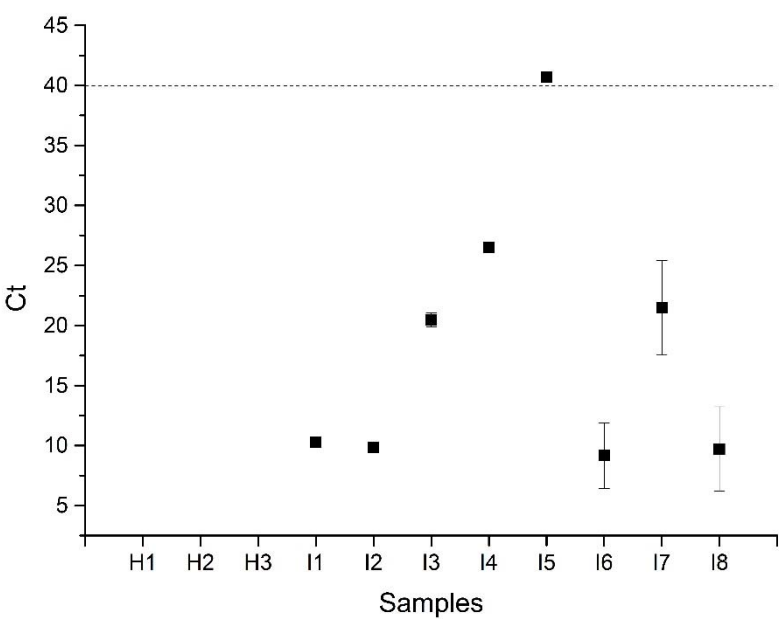

**Figure S5.** Ct values of samples extracted from healthy (H) and infected (I) plants. The dashed line represents detection limit.

## References

1. Finetti Sialer, M.; Di Franco, A.; Papanice, M.A.; Gallitelli, D. Tomato necrotic yellows induced by a novel strain of alfalfa mosaic virus. *Journal of Plant Pathology* **1997**, 79, (2), 115-120.
2. Xu, H.; Nie, J. Identification, Characterization, and molecular detection of Alfalfa mosaic virus in potato. *Phytopathology* **2006**, 96, (11), 1237-42.
3. Abdel Aleem, E. E.; Taha, R. M.; Fattouh, F. A., Biodiversity and full genome sequence of potato viruses Alfalfa mosaic virus and potato leaf roll virus in Egypt. *Journal of biosciences (Z Naturforsch C)* **2018**, 73, (11-12), 423-438.
4. Samarfard, S.; Bejerman, N.E.; Sharman, M.; Trucco, V.; Giolitti, F.; Dietzgen, R.G. Development and validation of PCR assays for detection of alfalfa dwarf disease-associated viruses in Australian lucerne pastures. *Australasian Plant Pathology* **2017**, 47, 215-225.
